# Supplementary material for: DNA methylation dynamics in mouse preimplantation embryos revealed by mass spectrometry
Source: PubMed Central journal article supplement (PMC4707515; doi:10.1038/srep19134), 2016-01-11
Supplement: srep19134-s1.pdf [file srep19134-s1.pdf]

# Supplementary figures and table for

## **DNA methylation dynamics in mouse preimplantation embryos revealed by mass spectrometry**

Yoshinori Okamoto<sup>1</sup>, Naoko Yoshida<sup>2</sup>, Toru Suzuki<sup>3</sup>, Nobuhiro Shimosawa<sup>4</sup>, Maki Asami<sup>3</sup>, Tomonari Matsuda<sup>5</sup>, Nakao Kojima<sup>1</sup>, Anthony C. F. Perry<sup>3†</sup>, and Tatsuyuki Takada<sup>6†</sup>

†Correspondence and requests for materials should be addressed to A.C.F.P. ([perry135@aol.com](mailto:perry135@aol.com)) or T.T. ([ttakada@ph.ritsumei.ac.jp](mailto:ttakada@ph.ritsumei.ac.jp)).

### **This PDF file includes**

Figures S1 to S4

Figure Legends S1 to S4

Table S1

**a****mouse 5mC (female)**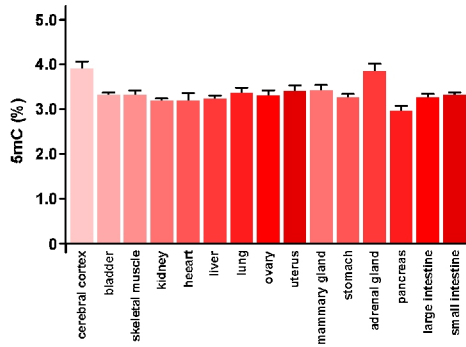**b****mouse 5hmC (female)**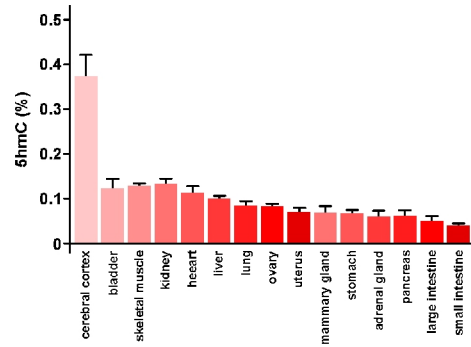**c****mouse 5mC (male)**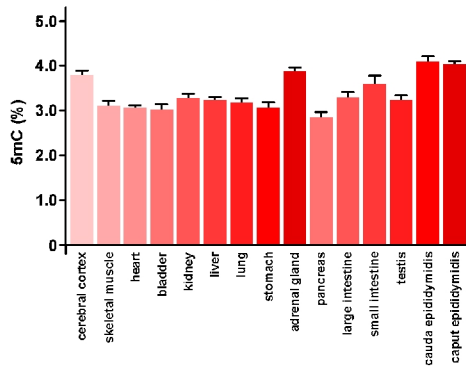**d****mouse 5hmC (male)**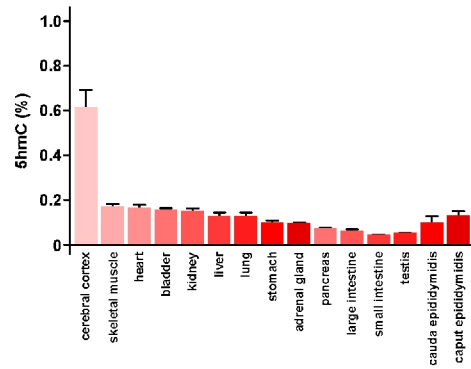**e*****M. fascicularis* 5mC**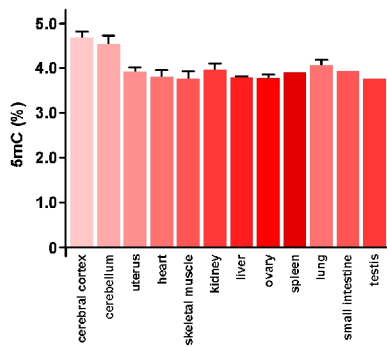**f*****M. fascicularis* 5hmC**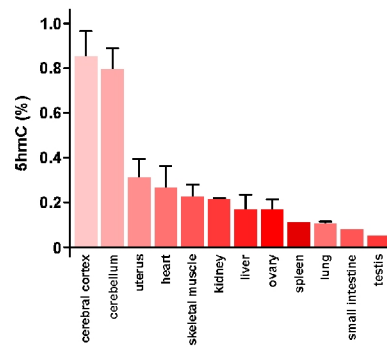

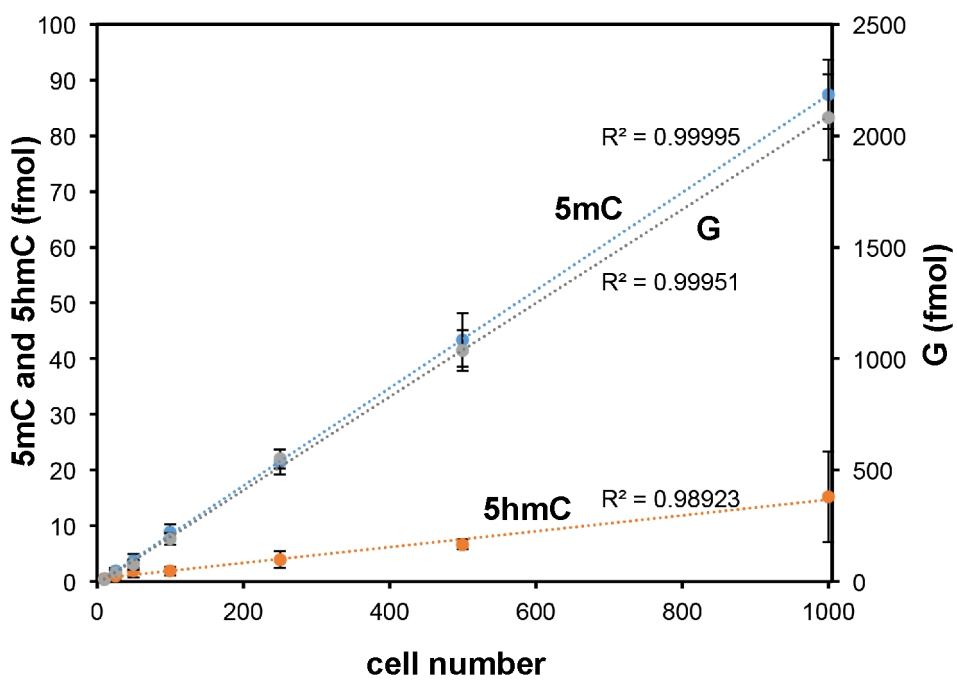

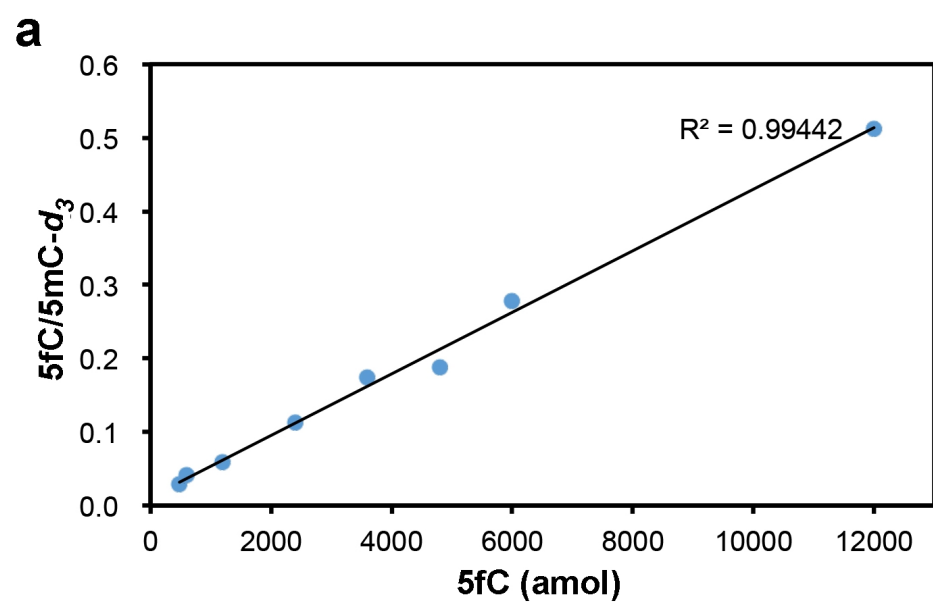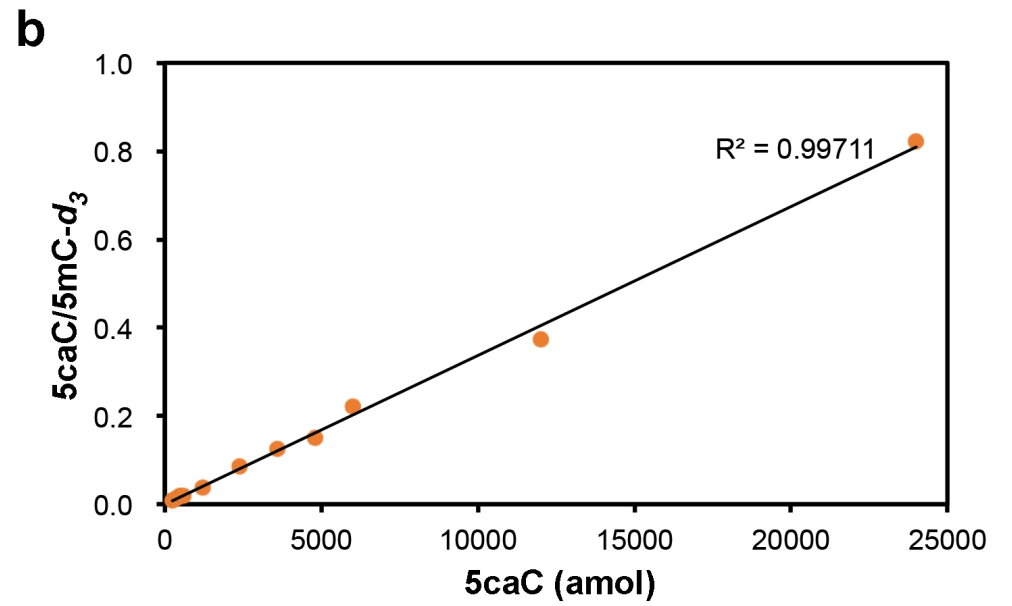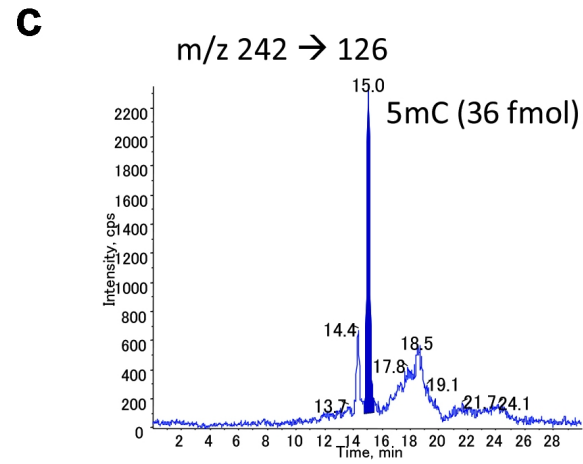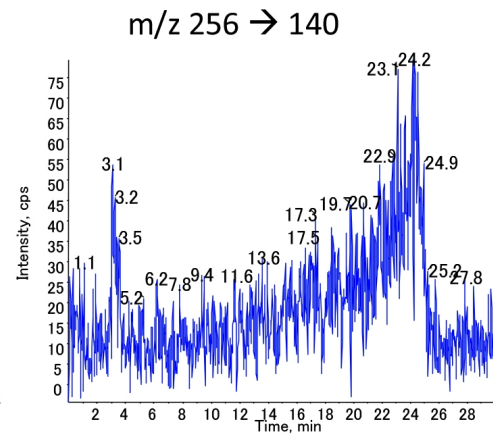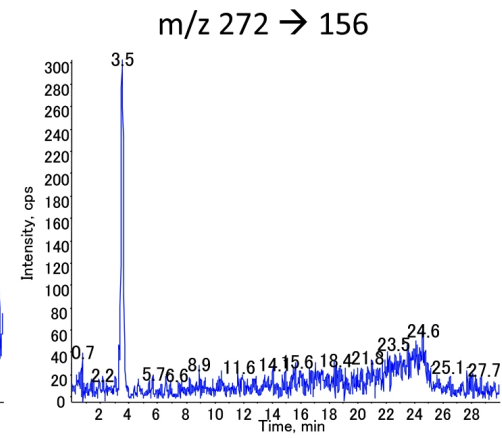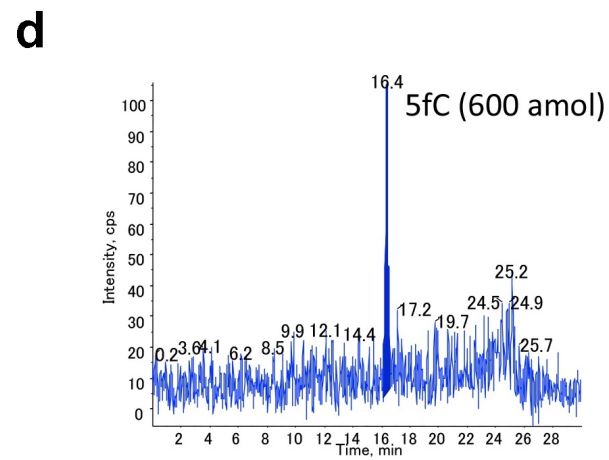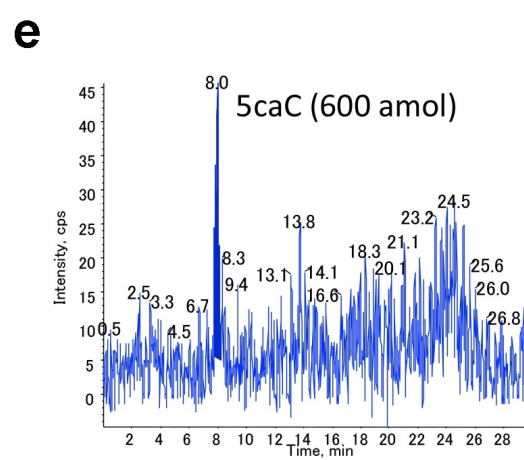

**a**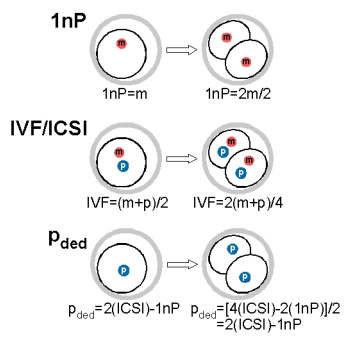**b**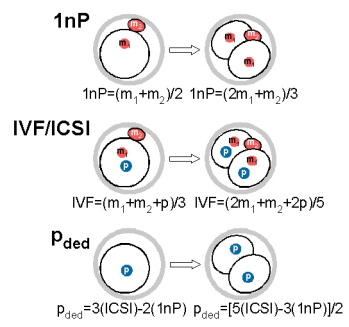

**Supplementary Table S1 Values of 5-methyl-2'-deoxycytidine (5mC) and 5-hydroxymethyl-2'-deoxycytidine (5hmC)**

| Sample            | time (h)<br>(stage)* | 5mC  |      | 5hmC |      | Samples,<br><i>n</i> | embryos/sample ( <i>n</i> )                                                 |
|-------------------|----------------------|------|------|------|------|----------------------|-----------------------------------------------------------------------------|
|                   |                      | mean | sd   | mean | sd   |                      |                                                                             |
| sperm             | -                    | 4.80 | 0.22 | 0.18 | 0.16 | 4                    | -                                                                           |
| mII <sup>†</sup>  | -                    | 4.46 | 0.46 | 0.15 | 0.09 | 15                   | 137, 110, 100, 101, 100, 123, 132,<br>132, 92, 120, 108, 100, 100, 100, 106 |
| IVF               | 3                    | 4.76 | 0.46 | nd   | -    | 3                    | 100, 100, 106                                                               |
|                   | 6                    | 3.42 | 0.50 | 0.12 | -    | 7                    | 100, 100, 93, 104, 110, 107,<br>106                                         |
|                   | 10                   | 2.89 | 0.20 | 0.07 | 0.02 | 6                    | 100, 100, 100, 101, 121, 146                                                |
|                   | 24                   | 2.82 | 0.25 | nd   | -    | 6                    | 100, 100, 56, 74, 50, 42                                                    |
|                   | 48                   | 2.61 | 0.40 | nd   | -    | 4                    | 16, 16, 15, 16                                                              |
|                   | 72                   | 1.85 | 0.16 | nd   | -    | 3                    | 10, 10, 10                                                                  |
|                   | 96                   | 1.10 | 0.08 | nd   | -    | 4                    | 7, 7, 7, 8                                                                  |
|                   | IVF+azaC             | 6    | 3.90 | 0.70 | 0.45 | -                    | 3                                                                           |
|                   | 24                   | 2.27 | 0.17 | 0.10 | -    | 3                    | 50, 50, 50                                                                  |
|                   | 48                   | 2.97 | 0.64 | 0.82 | -    | 1                    | 38                                                                          |
| 1nP               | 3                    | 4.88 | 0.05 | 0.26 | -    | 3                    | 100, 100, 100                                                               |
|                   | 6                    | 3.97 | 0.62 | nd   | -    | 5                    | 100, 100, 100, 100, 120                                                     |
|                   | 24                   | 3.06 | 0.58 | nd   | -    | 4                    | 100, 100, 50, 100                                                           |
| 1nP+azaC          | 6                    | 3.62 | 0.25 | nd   | -    | 1                    | 128                                                                         |
| 1nA               | 6                    | 2.77 | 0.63 | 1.38 | 0.98 | 3                    | 100, 100, 100                                                               |
|                   | 24                   | 2.11 | 0.78 | nd   | -    | 2                    | 100, 100                                                                    |
| ICSI              | 3                    | 4.60 | 0.39 | 0.16 | -    | 3                    | 100, 100, 100                                                               |
|                   | 6                    | 3.44 | 0.23 | 0.12 | 0.05 | 5                    | 100, 100, 100, 100, 150                                                     |
|                   | 24                   | 2.83 | 0.26 | nd   | -    | 3                    | 100, 100, 100                                                               |
| natural<br>mating | 8 (1C)               | 3.45 | 0.21 | 0.19 | 0.09 | 3                    | 235, 213, 150                                                               |
|                   | 26 (2C)              | 2.86 | 0.23 | 0.16 | 0.06 | 3                    | 130, 113, 93                                                                |
|                   | 36 (4C)              | 2.71 | 0.30 | 0.11 | 0.03 | 3                    | 50, 50, 50                                                                  |
|                   | 50 (8C)              | 2.15 | 0.12 | 0.22 | 0.06 | 4                    | 30, 28, 28, 22                                                              |
|                   | 72 (mor)             | 1.89 | 0.29 | 0.06 | 0.02 | 3                    | 142, 23, 93                                                                 |
|                   | 84 (B)               | 1.44 | 0.35 | 0.05 | 0.00 | 4                    | 38, 15, 15, 70                                                              |
|                   | 98 (eB)              | 1.09 | 0.19 | 0.05 | 0.01 | 5                    | 12, 25, 15, 151, 157                                                        |
| GV                | -                    | 4.69 | 0.70 | nd   | -    | 3                    | 127, 121, 139                                                               |
| caput             | -                    | 4.03 | 0.08 | 0.21 | 0.00 | 5                    | -                                                                           |
| cauda             | -                    | 4.08 | 0.15 | 0.19 | 0.01 | 5                    | -                                                                           |

Where  $n \leq 2$ , replicates are technical replicates. Sperm were from cauda epididymidis.

\*Estimated time in hours (h) after activation of development or sperm injection.

<sup>†</sup>Abbreviations: mII, metaphase II oocyte; IVF, *in vitro* fertilisation; nd, below detection threshold; azaC, 5-aza-2'deoxycytidine; 1nP, haploid parthenogenetic embryo; 1nA, haploid androgenetic embryo; ICSI, intracytoplasmic sperm injection; 1C-8C, 1- to 8-cell embryo; mor, morula; B, blastocyst; eB, expanded blastocyst; GV, germinal vesicle oocyte; caput, whole caput epididymidal tissue; cauda, whole cauda epididymidal tissue;
